# Supplementary material for: Concordance and Discordance Rates of V-Raf Murine Sarcoma Viral Oncogene Homolog B1 (BRAF)V600E Status in Metastatic against Primary Lesion of Melanoma: A Meta-analysis
Source: PubMed Central journal article supplement (PMC7590371; doi:10.31662/jmaj.2020-0016), 2020-07-07

Supplementary Figure 2. Funnel plot of probability of  $BRAF^{V600E}$  (+) in metastatic lesion of melanoma against  $BRAF^{V600E}$  (+) in primary lesion.

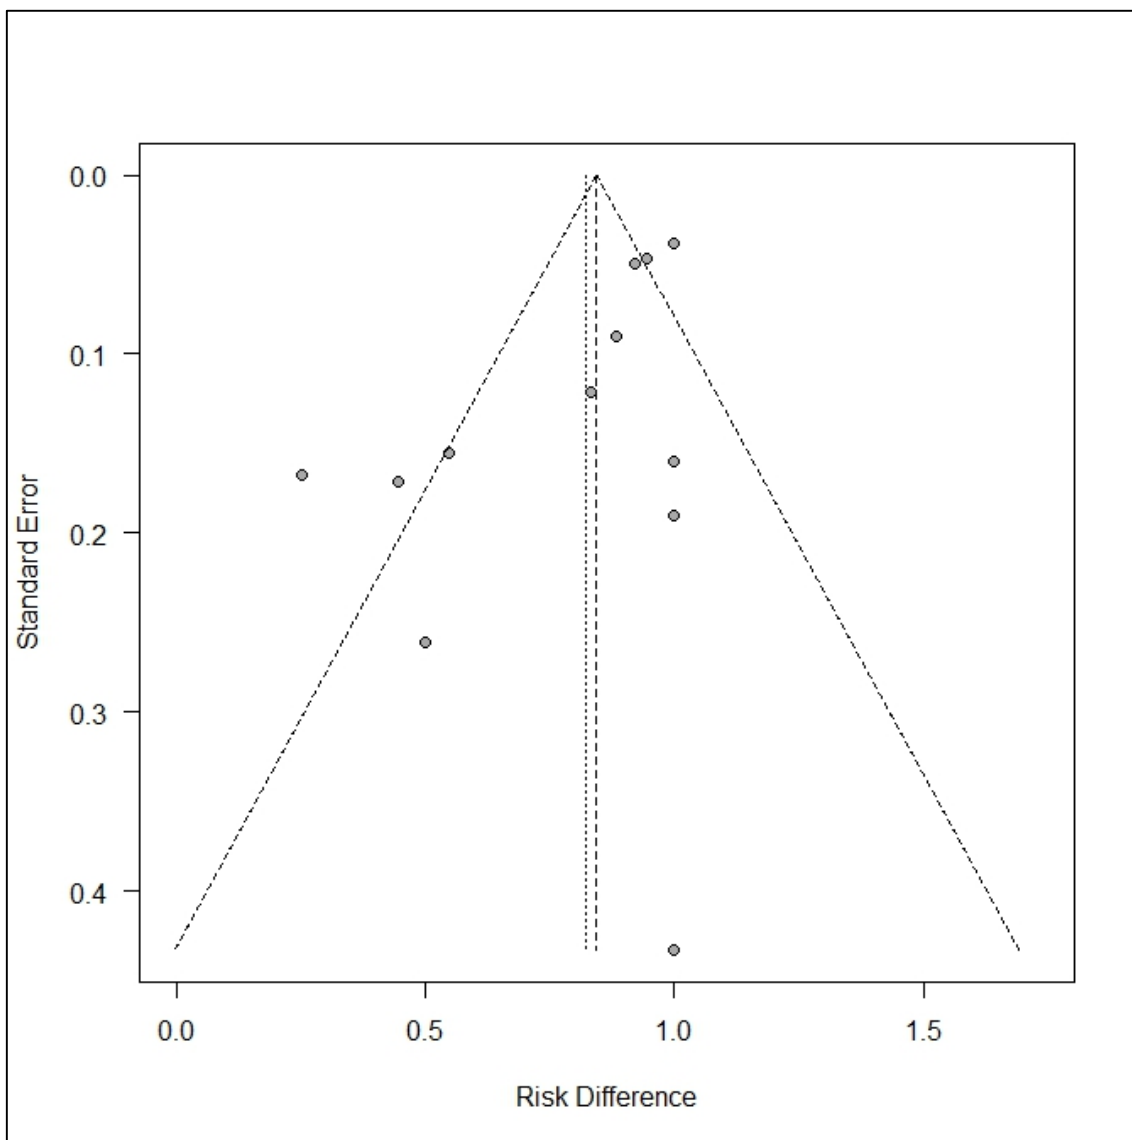

Supplement: 2433-3298-3-3-0274-s002.pdf [file 2433-3298-3-3-0274-s002.pdf]
